# Supplementary material
Source: publisher site journal article supplement (https://www.dovepress.com/article/434150)
Supplement: Supplementary file 1 [file get_supplementary_file.php]

**Figure S1: Survey Questionnaire**

**Section A (participant demographics, time spent on social media, and the frequency of using special media in classes)**

1. **Gender:**

- Female
- Male

1. **Age:**

- 16-20 years
- 21-25 years
- 26 years and above

1. **College:**

- Taibah
- Alrayam

1. **GPA:**

- 4.5 - 5
- 4 - 4.4
- 3 - 3.9
- 2 - 2.9
- less than 2

1. **Year of study:**

- Year 1
- Year 2
- Year 3
- Year 4
- Year 5
- Year 6

1. **Time spent on Social media:**

- less than 1 hour
- 1-2 h
- 2-3 h
- 3-4 h
- 4-5 h
- more than 6 hours

1. **Usage of Social Media during Class:**

- Never
- Rarely
- Sometimes
- Often
- Always

**Section B (Items of social media and academic performance of students' questionnaire)**

SA- Strongly Agree, A- Agree, D- Disagree, SD- Strongly Disagree

| **S/N** | **ITEMS** | **SA** | **A** | **D** | **SD** |
| --- | --- | --- | --- | --- | --- |
|  | **Students' addictiveness to social networks and academic performance** | | | | |
| 1 | Addiction to online social networks is a problematic issue that affects my academic life. |  |  |  |  |
| 2 | Online social networks distract me from my studies. |  |  |  |  |
| 3 | Hours spent online can never be compared to the number of hours I spend studying. |  |  |  |  |
| 4 | There is no improvement in my grades since I became engaged into social networking sites. |  |  |  |  |
|  | **Exposure of students to social media networks and their academic performance** | | | | |
| 5 | I usually have unlimited access to social media and this has affected my academic performance negatively. |  |  |  |  |
| 6 | I engage in academic discussions on social media and this has improved my academic performance. |  |  |  |  |
| 7 | I make use of social media to disseminate knowledge to my classmate. |  |  |  |  |
| 8 | I Solely rely on information gotten from social media to do my assignments without consulting other sources. |  |  |  |  |
|  | **Use of social media and Students’ academic performance** | | | | |
| 9 | The usage of social media has helped improve my grades. |  |  |  |  |
| 10 | Engaging in academic forums reduces my rate of understanding. |  |  |  |  |
| 11 | I use materials gotten from blogging sites to complement what I have been taught in class. |  |  |  |  |
| 12 | I will not perform well in my academics even if I stop using social media. |  |  |  |  |
|  | **Gender usage of social media** | | | | |
| 13 | Male and female students use social media networks differently in different frequencies. |  |  |  |  |
| 14 | Gender determines the level of social media network usage. |  |  |  |  |
|  | **Age usage of social media** | | | | |
| 15 | Age has impact on the use of social media. |  |  |  |  |
| 16 | Social media become boring as I grow older. |  |  |  |  |
| 17 | Social media is not relevant to people of older generation. |  |  |  |  |
| 18 | The younger generation are the most active users of social media. |  |  |  |  |
